# Heterogeneity in the respiratory symptoms of patients with mild-moderate COPD

Kate M. Johnson<sup>1</sup>, Abdollah Safari<sup>1,4</sup>, Wan C. Tan<sup>2</sup>, Jean Bourbeau<sup>3</sup>, J Mark FitzGerald<sup>4</sup>, Mohsen Sadatsafavi<sup>1,4,5</sup>, for the *Canadian Cohort of Obstructive Lung Disease (CanCOLD)* study and the *Canadian Respiratory Research Network*

## **Affiliations:**

1. Collaboration for Outcomes Research and Evaluation, Faculty of Pharmaceutical Sciences, University of British Columbia, Vancouver, Canada
2. Centre for Heart Lung Innovation (the James Hogg Research Centre), St. Paul's Hospital, Vancouver, Canada
3. Respiratory Epidemiology and Clinical Research Unit, McGill University Health Centre, Montreal, Canada
4. Institute for Heart and Lung Health, Department of Medicine, the University of British Columbia, Vancouver, Canada
5. Centre for Clinical Epidemiology and Evaluation, Vancouver Coastal Health Institute, Vancouver, Canada

## **Corresponding Author:** Mohsen Sadatsafavi

Faculty of Pharmaceutical Sciences, University of British Columbia,  
Vancouver Campus,  
2405 Wesbrook Mall  
Vancouver, BC Canada V6T 1Z3  
Tel: 604.827.3020 | Fax: 604.875.5179  
Email: [msafavi@mail.ubc.ca](mailto:msafavi@mail.ubc.ca)

Running header: Heterogeneity in COPD symptoms

Word count: 2,783 (without abstract, references, tables, and figure captions)

1 **ABSTRACT**

2 **Background:** The burden of symptoms varies markedly between patients with Chronic  
3 Obstructive Pulmonary Disease (COPD) and is only weakly correlated with lung function  
4 impairment. While heterogeneity in lung function decline and exacerbations have been  
5 previously studied, the extent of heterogeneity in symptoms and the factors associated with this  
6 heterogeneity are not well understood.

7 **Methods:** A sample of the general Canadian population  $\geq 40$  years with persistent airflow  
8 limitation was followed for up to 3 years. Participants reported whether they experienced chronic  
9 coughing, phlegm, wheezing, or dyspnea during visits at 18-month intervals. We used mixed-  
10 effect logistic regression models (separately for each symptom) to assess overall heterogeneity in  
11 the occurrence of symptoms between individuals, and the proportion of variation in symptom  
12 burden explained by lung function versus all other clinical characteristics of participants.

13 **Results:** 548 participants (54% male, mean age 67 years) contributed 1,086 visits in total, and  
14 82% of patients reported at least one symptom during follow-up. There was substantial  
15 heterogeneity in the individual-specific probabilities for the occurrence of symptoms. This  
16 heterogeneity was highest for dyspnea and lowest for phlegm (interquartile range of  
17 probabilities: 0.15-0.77 and  $<0.01$ -0.53, respectively). FEV<sub>1</sub> explained 82% of the variation  
18 between individuals in the occurrence of phlegm, 26% for dyspnea, 3% for cough, and  $<0.1\%$  for  
19 wheeze. All clinical characteristics of participants (including FEV<sub>1</sub>) explained between 86% of  
20 heterogeneity in the occurrence of phlegm to  $<1\%$  for wheeze.

21 **Conclusion:** There is marked heterogeneity in the burden of respiratory symptoms between  
22 COPD patients. The ability of lung function and other commonly measured clinical  
23 characteristics to explain this heterogeneity differs between symptoms.

24

25 **Word count:** 262

26

27 **Keywords:** Population; Respiratory symptoms; Chronic Obstructive Pulmonary Disease;

28 Variability

## 29 **1.0 INTRODUCTION**

30 Chronic obstructive pulmonary disease (COPD) is a common inflammatory lung condition that  
31 affects close to 400 million people worldwide.<sup>1</sup> COPD is characterized by persistent airflow  
32 limitation and symptoms such as breathlessness, chronic cough, sputum production, wheezing,  
33 and chest tightness.<sup>2</sup> Respiratory symptoms are a major burden in many patients, and are  
34 associated with an increased frequency of exacerbations,<sup>3</sup> worse disease prognosis,<sup>4-6</sup> lower  
35 health status,<sup>7,8</sup> reduced quality of life,<sup>9</sup> and higher healthcare resource utilization.<sup>10</sup>

36 The three major components of the natural history of COPD are lung function status,  
37 patterns of exacerbations, and symptom burden.<sup>2</sup> The degree of symptom impairment is  
38 increasingly recognized as an important determinant of patient management strategies, and one  
39 that is only partially dependent on the severity of airflow limitation.<sup>4,7,11,12</sup> Indeed, modern  
40 guidelines such as the Global Initiative for Chronic Obstructive Lung Disease (GOLD)  
41 appreciate the importance of all three components in disease management decisions. The GOLD  
42 guidelines recommend evaluating symptoms separately from airflow limitation and history of  
43 exacerbations in providing therapeutic recommendations.<sup>2</sup>

44 It is increasingly recognized that COPD is a heterogeneous disease. Individuals can vary  
45 markedly in their rate of lung function decline<sup>13</sup> and frequency of exacerbations<sup>14,15</sup> over the  
46 course of their disease. For example, COPD patients in the Lung Health Study had an annual rate  
47 of change in FEV<sub>1</sub> that ranged from rapidly declining to modestly increasing (95% CI -83 mL/yr  
48 to +15 mL/yr).<sup>13</sup> Similarly, the annual rate of exacerbations observed in the MACRO clinical  
49 trial varied from 0.47 to 4.22.<sup>15</sup> Quantifying this variation at an individual level is critical to  
50 enabling precise risk factor and disease management.<sup>16</sup>

51 In contrast, heterogeneity in the burden of symptoms has not received the same level of  
52 attention as these other disease components. Previous studies have reported that patient

53 symptoms tend to vary over the day, week, or season,<sup>11,17–19</sup> but the extent of variation between  
54 individuals in the occurrence of symptoms has been less well characterized. Understanding the  
55 extent and drivers of this heterogeneity can help improve our understanding of the natural history  
56 of COPD and ultimately help formulate disease management strategies that provide optimal  
57 therapeutic strategies for each patient.

58       Using data from a population-based prospective cohort, we assessed the burden of self-  
59 reported respiratory symptoms in patients with persistent airflow limitation in order to (1)  
60 characterize variation in the occurrence of symptoms between individuals, and (2) determine the  
61 proportion of between-individual variability in symptoms that can be explained by lung function  
62 versus all other observable characteristics. We hypothesized that there is high variability in the  
63 occurrence of symptoms between individuals, and that an individual's clinical and demographic  
64 characteristics explain a larger fraction of this heterogeneity than lung function alone.

65

66

## 67 **2.0 METHODS**

68 We used data from the Canadian Cohort of Obstructive Lung Disease (CanCOLD), which is a  
69 multicenter prospective longitudinal cohort study conducted across Canada.<sup>20</sup> Individuals  $\geq 40$   
70 years old were recruited using random digit dialing and multi-level sampling to ensure  
71 representativeness of the general Canadian population. Participants were followed for a  
72 maximum of 3 years with in-person visits at baseline and at 18-month intervals. From the entire  
73 cohort of CanCOLD participants (N=1,532), we selected all visits in which the patient had  
74 persistent airflow limitation, defined as post-bronchodilator FEV1/FVC < lower limit of normal  
75 (LLN).<sup>21</sup>

76 Information was collected during each visit on the presence of cough, phlegm, wheeze,  
77 and dyspnea using separate questions for each symptom. Participants reported whether they (1)  
78 usually coughed in the absence of a cold, (2) brought up phlegm from the chest in the absence of  
79 a cold, and (3) experienced any wheezing or whistling in the chest. Dyspnea (4) was measured  
80 using the Medical Research Council (MRC) dyspnea scale,<sup>22</sup> which was converted to a binary  
81 variable by assuming that a score of 2-5 indicated the presence of dyspnea. Dyspnea and whether  
82 the participant experienced any symptoms were assessed in a subset of the data that included 957  
83 visits from 502 participants because 46 participants were unable to walk and therefore did  
84 complete the MRC dyspnea test. Participants reported their demographic information, smoking  
85 status and history, number of comorbidities, and history of physician-diagnosed COPD,  
86 emphysema, or chronic bronchitis at each visit using validated questionnaires with a recall period  
87 spanning the length of time between visits.<sup>23</sup>

88

## 89 **Statistical analysis**

90 We used separate random effect logistic regression models for cough, phlegm, wheeze,  
91 dyspnea, and any symptoms to model heterogeneity. The random effect term captured the  
92 variability among individuals (heterogeneity) that was not attributable to the independent  
93 variables in the model. We initially determined the total heterogeneity in the occurrence of  
94 symptoms using an intercept-only logistic regression model for each symptom (the null model,  
95 *ie*, no independent variables). We used this model to determine the individual-specific  
96 probability of experiencing each symptom, and estimated the interquartile (25%-75%) range of  
97 probabilities to measure heterogeneity in the occurrence of symptoms.

98           We subsequently assessed the proportion of the total heterogeneity in symptoms that  
99   could be explained by all measured characteristics of individuals. For this, we included patient  
100   age, sex, body mass index (BMI), ethnicity, number of comorbidities, smoking status, pack-years  
101   of smoking, post-bronchodilator forced expiratory volume in 1 second (FEV<sub>1</sub>), and diagnosis  
102   status as independent variables in each model (the full models). In order to determine the  
103   variance explained by the independent variables (*ie*, participants' measured characteristics), we  
104   calculated the proportion of variance in the random effect of the full model for each symptom  
105   (with all the independent variables), compared to the variance in the random effect of the null  
106   model with no independent variables.<sup>24</sup> We repeated this process using a reduced model with  
107   FEV<sub>1</sub> as the only independent variable (as opposed to the full model) to determine the proportion  
108   of total heterogeneity explained by lung function alone.

109           We conducted sensitivity analyses in which percent predicted FEV<sub>1</sub> and GOLD grade  
110   were used in place of FEV<sub>1</sub> as indicators of lung function (collinearity prevented these variables  
111   from being included in the model at the same time). Seasonality was not included in the main  
112   analysis because the recall period was >1 year and therefore spanned all seasons; however,  
113   season was assessed in a sensitivity analysis to account for the possibility that patients were more  
114   likely to recall their recent symptom burden (which could be affected by the current season). All  
115   analyses were performed in SAS (version 9.4, 2016).

116

117

### 118   **3.0 RESULTS**

119   The characteristics of participants are shown in *Table 1*. There were 1,086 visits from 548  
120   participants in the final sample (54% male, mean age 67 years). 92% of participants had mild to

121 moderate disease (grade I-II), 7% had severe disease (grade III), and 1% had very severe disease  
122 (grade IV) as measured by GOLD grades.<sup>2</sup> 74% of participants with persistent airflow limitation  
123 on spirometry had not been previously diagnosed. The average follow-up time was 18 months;  
124 39% of participants underwent only one study visit, and 37% of participants were assessed at  
125 three study visits. The characteristics of the subset of the data used to analyze dyspnea and any  
126 symptoms were very similar (*Supplementary Material, Table 1*).

127 <<[Table 1](#)>>

128

129 ***Objective 1: Heterogeneity in the occurrence of symptoms***

130 Most participants did not report having cough, phlegm, wheeze, or dyspnea at each study visit,  
131 but only 18% of participants were completely asymptomatic throughout the study period. The  
132 asymptomatic participants tended to have mild airflow obstruction (mean of 89% predicted  
133 FEV<sub>1</sub>, 16% SD). The proportion of patients that reported a given symptom at least once during  
134 follow-up ranged from 38% for phlegm (the least common symptom) to 56% for dyspnea (the  
135 most common symptom). Symptoms were generally stable within participants: 66% of  
136 participants reported the same level of cough throughout their follow-up (the least stable  
137 symptom), and 75% for phlegm (the most stable symptom).

138 There was substantial variation in the individual-specific probabilities for the occurrence  
139 of symptoms (*Figure 1*). The median probabilities of an individual experiencing cough, wheeze,  
140 and dyspnea were 0.36, 0.34, and 0.44, respectively. In contrast, the median probability of  
141 experiencing phlegm was <0.01 and it was >0.99 for any symptoms. The interquartile range of  
142 probabilities was 0.13-0.68 for cough, <0.01-0.53 for phlegm, 0.10-0.72 for wheeze, 0.15-0.77



143 for dyspnea, and 0.56->0.99 for any symptoms. Median probabilities are depicted with blue lines  
144 and interquartile ranges are depicted with grey boxes in Figure 1.

145 <<[Figure 1](#)>>

146

147 ***Objective 2: Influence of lung function on symptom heterogeneity***

148 The logistic regression models revealed relatively consistent associations between patient and  
149 disease characteristics and the presence of cough, phlegm, wheeze, dyspnea and any symptoms.  
150 Comparisons of the strength of associations across individual symptoms are shown in ***Figure 2***,  
151 and with any symptoms in ***Figure 3***. Lung function, sex, pack-years of smoking, BMI, and  
152 whether the participant had previously received a diagnosis of COPD were associated with most  
153 patient-reported symptoms. Ethnicity and the number of comorbidities were not associated with  
154 symptoms. Lung function was most strongly associated with the presence of any symptoms (OR  
155 per 100 mL increase in FEV<sub>1</sub> 0.83, 95% CI 0.77-0.88), and least strongly associated with the  
156 presence of cough (OR 0.94, 95% CI 0.90-0.98). These results were similar when lung function  
157 was assessed as percent predicted FEV<sub>1</sub> or GOLD grade in sensitivity analyses (results not  
158 shown). Higher pack-years of smoking, BMI, and a previous diagnosis of COPD were all  
159 associated with an increased odds of reporting most symptoms. Males were more likely than  
160 females to report the presence of cough (OR 2.12, 95% CI 1.18-3.81), phlegm (OR 6.95, 95% CI  
161 2.74-17.59), wheeze (OR 2.86, 95% CI 1.34-6.11), and any symptoms (OR 3.16, 95% CI 1.38-  
162 7.23). Summer (vs. winter) was associated with increased reporting of cough (OR 2.02 95% CI  
163 1.12-3.62), wheeze (OR 2.80 95% CI 1.44-5.46) and any symptoms (OR 2.89, 95% CI 1.34-  
164 6.24) when it was included in sensitivity analyses.

165 <<[Figure 2](#)>>

166 <<[Figure 3](#)>>

167

168 The proportion of between-individual variation in the occurrence symptoms that could be  
169 attributed to participants' measured characteristics (all independent variables in the full models)  
170 was 21%, 86%, <1%, 44%, and 92%, for cough, phlegm, wheeze, dyspnea, and any symptoms,  
171 respectively (*Table 2*). The proportion of variation explained by FEV<sub>1</sub> alone ranged from 0%  
172 (for wheeze) to 82% (for phlegm, *Table 2*).

173 <<[Table 2](#)>>

174

175

#### 176 **4.0 DISCUSSION**

177 We have characterized heterogeneity in the occurrence of respiratory symptoms between patients  
178 with persistent airflow limitation and assessed the extent to which commonly measured patient  
179 and disease characteristics explained the observed heterogeneity in symptoms. Respiratory  
180 symptoms were very common in this sample of the general population; four out of every five  
181 participants reported experiencing symptoms despite over 90% of patients having mild to  
182 moderate COPD, and only 26% of them having been diagnosed with COPD. Dyspnea was the  
183 most common symptom, followed by cough and wheeze. Individual-specific probabilities for the  
184 occurrence of symptoms were highly variable between individuals and for different symptoms.  
185 The interquartile range of probabilities was the largest for dyspnea and wheeze, indicating  
186 greater variability between individuals in the presence of these symptoms than for cough and  
187 phlegm. For phlegm, the majority of individuals had a probability of experiencing phlegm near 0  
188 or 1 (visible in Figure 1 as a higher density of points at the edges of the plot). In contrast, the

189 individual-specific probabilities for cough, wheeze, and dyspnea were more evenly spread across  
190 the range of possible values. This indicates that phlegm is more stable in nature, and that  
191 individuals who do not currently have phlegm are unlikely to report it in the future. Indeed, a  
192 pan-European study reported that daily and weekly variability in dyspnea, wheeze, and cough  
193 were higher than that for phlegm.<sup>25</sup> Our findings extend these observations on symptom  
194 variability within individuals to variability between individuals in the occurrence of symptoms.  
195 As a result, tools for assessing COPD severity that involve the measurement of symptoms (such  
196 as the GOLD ABCD assessment tool)<sup>2</sup>, are likely to be more or less variable over time,  
197 depending on the symptom measured.

198         The proportion of heterogeneity explained by the measured characteristics of participants  
199 differed substantially between symptoms. Most heterogeneity in the occurrence of phlegm and  
200 any symptoms, and approximately half the heterogeneity in dyspnea, was explained by the  
201 demographic and clinical characteristics of participants included in the models. In contrast, these  
202 characteristics explained very little heterogeneity in cough and wheeze, indicating that other  
203 characteristics not included in our models are more important drivers of these symptoms. Indeed,  
204 age, sex, BMI, smoking history, and lung function (cough only) were weakly correlated with  
205 cough frequency<sup>26</sup> and the presence of wheezing<sup>27</sup> in previous studies. Instead, cough frequency  
206 was driven by current smoking intensity and percentage of sputum neutrophils,<sup>26</sup> and the  
207 presence of wheezing was associated with frequent exacerbations and increased dyspnea.<sup>27</sup>

208         Although lung function has traditionally been regarded as the primary driver of  
209 respiratory symptoms,<sup>28</sup> we found that FEV<sub>1</sub> explained the majority of between-individual  
210 variation in only the occurrence of phlegm, although it explained a substantial minority of  
211 variation in dyspnea and any symptoms. This finding is in line with the observation of high

212 symptom variability within levels of disease severity,<sup>29</sup> and high short-term variability in  
213 symptoms that is not due to changes in lung function.<sup>4,12</sup> Our results extend these previous  
214 studies by examining the role of FEV<sub>1</sub> in each symptom individually. They suggest that lung  
215 function is the primary driver of the occurrence of phlegm, an important but not dominant driver  
216 of the occurrence of dyspnea and any symptoms, but it explains very little between-individual  
217 variation in the occurrence of cough and wheeze.

218         In addition to analyzing heterogeneity in symptoms, we documented associations  
219 between symptoms and age, sex, BMI, smoking pack-years, FEV<sub>1</sub>, and a previous diagnosis of  
220 COPD. In particular, we observed substantial sex-based differences in the reporting of all  
221 symptoms apart from dyspnea. Controlled for disease severity, smoking history, and other  
222 variables, male patients were over three times more likely to be symptomatic, and seven times  
223 more likely to report experiencing phlegm. Whether this is a biological phenomenon, or due to  
224 gender-related differences in the experience of symptoms,<sup>30</sup> remains to be further assessed.

225         Unique features of this study are its population-based sample and our assessment of the  
226 different sources of variation in symptoms. The associations determined from conventional  
227 regressions describe the relation between patient and disease characteristics and the presence of a  
228 symptom for an average participant. Our use of a random effect term in our models enabled us to  
229 extend these results by describing the extent to which these population-level associations apply  
230 to a given individual. We found that variation between individuals in the presence of phlegm and  
231 any symptoms was very well described by these population-level associations, but this was not  
232 the case for wheeze and cough (and somewhat the case for dyspnea). The assessment of variation  
233 at an individual-level is critical to fully characterizing heterogeneity in the natural history of

234 COPD, and ultimately to enabling effective use of symptoms in risk prediction tools and case  
235 finding algorithms for COPD.

236         This study has several strengths. First, CanCOLD is a large, nationally representative  
237 sample of Canadians with COPD in the general population. The study employed standardized  
238 spirometry, validated questionnaires, and a long follow-up time. Our sample consisted primarily  
239 of patients with mild-moderate COPD, a population that is often underrepresented in large cohort  
240 studies. The population-based nature of the study makes it a better source for studying disease  
241 heterogeneity than clinical cohorts. However, this study also has several limitations. Patients  
242 reported their respiratory symptoms with a recall period that spanned the length of time between  
243 study visits, which could reach a maximum of three years. The long duration of the recall period  
244 is likely to have resulted in inaccuracies in symptom reporting. In addition, we only assessed the  
245 presence of symptoms, not their intensity. A more granular measurement of patient symptoms  
246 could provide a more nuanced assessment of symptom variability. Finally, we could not  
247 investigate the impact of factors that were not included in our model, in particular the use of  
248 treatment to control symptoms. Although this would likely have reduced the proportion of  
249 variation in symptoms that we attributed to unmeasured characteristics, the long recall period is  
250 less influenced by short-term variation in symptoms due to treatment.

251

252

## 253 **5.0 CONCLUSION**

254 We assessed a sample of the general population with mostly mild-moderate COPD and found  
255 substantial variation in the occurrence of respiratory symptoms between individuals. Lung  
256 function explained the majority of between-individual variation in only the occurrence of

257 phlegm, and a much smaller proportion of variation in dyspnea, cough, and wheeze. For cough  
258 and wheeze in particular, commonly measured patient and disease characteristics explained very  
259 little heterogeneity in the occurrence of these symptoms. Overall, the observed differences in  
260 symptom variation may reflect the divergent etiology of symptoms associated with COPD, and  
261 suggests that defining endotypes that are predictive of a high symptom burden is a key area of  
262 future research.

263 **ABBREVIATIONS**

264 **COPD:** Chronic Obstructive Pulmonary Disease

265 **CanCOLD:** Canadian Cohort of Obstructive Lung Disease Study

266 **FEV<sub>1</sub>:** Forced Expiratory Volume in 1 second

267 **FVC:** Forced Vital Capacity

268 **GOLD:** Global Initiative for chronic Obstructive Lung Disease

269 **LLN:** Lower Limit of Normal

270 **MRC:** Medical Research Council dyspnea scale

271 **OR:** Odds Ratio

272 **SD:** Standard Deviation

273

274 **DECLARATIONS**

275 **Ethics approval and informed consent:** Ethics approval for CanCOLD was obtained from the  
276 relevant institutional review board at each study site. Written informed consent was obtained  
277 from all participants prior to study entry.

278 **Consent for publication:** Not applicable.

279 **Availability of data and materials:** The data analyzed in the current study are not publicly  
280 available but may be made available from the CanCOLD Research Group upon reasonable  
281 request.

282 **Competing interests:** The authors declare that they have no competing interests.

283 **Funding:** The current study was funded by a Canadian Lung Association Breathing as One  
284 Studentship Award and the Canadian Institutes of Health Research (application number 142238).  
285 The Canadian Cohort Obstructive Lung Disease (CanCOLD) study is currently funded by the

286 Canadian Respiratory Research Network (CRRN); industry partners: Astra Zeneca Canada Ltd;  
287 Boehringer Ingelheim Canada Ltd; GlaxoSmithKline Canada Ltd; and Novartis. Researchers at  
288 RI-MUHC Montreal and Icapture Centre Vancouver lead the project. Previous funding partners  
289 are the CIHR (CIHR/Rx&D Collaborative Research Program Operating Grants 93326); the  
290 Respiratory Health Network of the Fonds de la recherche en santé du Québec (FRSQ); industry  
291 partners: Almirall; Merck Nycomed; Pfizer Canada Ltd; and Theratechnologies. The funders had  
292 no role in study design, data collection and analysis, or preparation of the manuscript.

293 **Author Contributions:** WT and JB are co-Principal Investigators of the CanCOLD study. MS  
294 and KJ formulated the current study idea. KJ performed all data analyses and wrote the first draft  
295 of the manuscript. AS provided guidance on the statistical analysis. All authors contributed to  
296 interpretation of findings, critically commented on the manuscript and approved the final  
297 version. MS is the guarantor of the manuscript.

298 **Acknowledgements:** The authors thank the men and women who participated in the study and  
299 individuals in the CanCOLD Collaborative Research Group.

300 Members of the CanCOLD Collaborative Research Group are as follows. Executive Committee:  
301 Jean Bourbeau (McGill University, Montreal, Canada); Wan C. Tan, J. Mark FitzGerald; Don  
302 Sin (UBC, Vancouver, Canada); Darcy Marciniuk (University of Saskatoon, Saskatoon,  
303 Canada); Dennis E. O'Donnell (Queen's University, Kingston, Canada); Paul Hernandez  
304 (Dalhousie University, Halifax, Canada); Kenneth R. Chapman (University of Toronto, Toronto,  
305 Canada); Robert Cowie (University of Calgary, Calgary, Canada); Shawn Aaron (University of  
306 Ottawa, Ottawa, Canada); F. Maltais (University of Laval, Quebec City, Canada). International  
307 Advisory Board: Jonathon Samet (Keck School of Medicine of USC, Los Angeles, CA); Milo  
308 Puhan (John Hopkins School of Public Health, Baltimore, MD); Qutayba Hamid (McGill



309 University, Montreal, Canada); James C. Hogg (UBC James Hogg Research Center, Vancouver,  
310 Canada). Operations Center: Jean Bourbeau (PI), Carole Jabet, Palmina Mancino, (McGill  
311 University, Montreal, Canada); Wan C. Tan (co-PI), Don Sin, Sheena Tam, Jeremy Road, Joe  
312 Comeau, Adrian Png, Harvey Coxson, Jonathon Leipsic, Cameron Hague (University of British  
313 Columbia James Hogg Research Center, Vancouver, Canada). Economic Core: Mohsen  
314 Sadatsafavi (University of British Columbia, Vancouver, Canada). Public Health Core: Teresa  
315 To, Andrea Gershon (University of Toronto, Toronto, Canada). Data Management and Quality  
316 Control: Wan C. Tan, Harvey Coxson (UBC, Vancouver, Canada); Jean Bourbeau, Pei Zhi Li,  
317 Zhi Song, Yvan Fortier, Andrea Benedetti, Dennis Jensen (McGill University, Montreal,  
318 Canada). Field Centers: Wan C. Tan (Vancouver PI), Christine Lo, Sarah Cheng, Elena Un,  
319 Cindy Fung, Nancy Haynes, Junior Chuang, Licong Li, Selva Bayat, Amanda Wong, Zoe Alavi,  
320 Catherine Peng, Bin Zhao, Nathalie Scott-Hsiung, Tasha Nadirshaw (UBC James Hogg Research  
321 Center, Vancouver, Canada); Jean Bourbeau (Montreal PI), Palmina Mancino, David Latreille,  
322 Jacinthe Baril, Laura Labonté (McGill University, Montreal, Canada); Kenneth Chapman  
323 (Toronto PI), Patricia McClean, Nadeen Audisho (University of Toronto, Toronto, Canada); R.  
324 Cowie and B. Walter (Calgary PI), Ann Cowie, Curtis Dumonceaux, Lisette Machado  
325 (University of Calgary, Calgary, Canada); Paul Hernandez (Halifax PI), Scott Fulton, Kristen  
326 Osterling (Dalhousie University, Halifax, Canada); Shawn Aaron (Ottawa PI), Kathy  
327 Vandemheen, Gay Pratt, Amanda Bergeron (University of Ottawa, Ottawa, Canada); Denis  
328 O'Donnell (Kingston PI), Matthew McNeil, Kate Whelan (Queen's University, Kingston,  
329 Canada); François Maltais (Quebec PI), Cynthia Brouillard (Université Laval, Quebec City,  
330 Canada); Darcy Marciniuk (Saskatoon PI), Ron Clemens, Janet Baran (University of Saskatoon,  
331 Saskatoon, Canada).

332 **REFERENCES**

- 333 1. Adeloje D, Chua S, Lee C, et al. Global and regional estimates of COPD prevalence:  
334 Systematic review and meta-analysis. *J Glob Health*. 2015;5(2):020415.  
335 doi:10.7189/jogh.05-020415
- 336 2. From the Global Strategy for the Diagnosis, Management and Prevention of COPD. Global  
337 Initiative for Chronic Obstructive Lung Disease (GOLD). 2017. <http://goldcopd.org>.  
338 Accessed May 1, 2017.
- 339 3. Roche N, Small M, Broomfield S, Higgins V, Pollard R. Real world COPD: association of  
340 morning symptoms with clinical and patient reported outcomes. *COPD*. 2013;10(6):679-  
341 686. doi:10.3109/15412555.2013.844784
- 342 4. Miravittles M, Ribera A. Understanding the impact of symptoms on the burden of COPD.  
343 *Respir Res*. 2017;18:67. doi:10.1186/s12931-017-0548-3
- 344 5. Bridevaux P-O, Gerbase MW, Probst-Hensch NM, Schindler C, Gaspoz J-M, Rochat T.  
345 Long-term decline in lung function, utilisation of care and quality of life in modified GOLD  
346 stage 1 COPD. *Thorax*. 2008;63(9):768-774. doi:10.1136/thx.2007.093724
- 347 6. Rennard SI, Drummond MB. Early chronic obstructive pulmonary disease: definition,  
348 assessment, and prevention. *Lancet*. 2015;385(9979):1778-1788. doi:10.1016/S0140-  
349 6736(15)60647-X
- 350 7. Miravittles M, Worth H, Soler Cataluña JJ, et al. Observational study to characterise 24-  
351 hour COPD symptoms and their relationship with patient-reported outcomes: results from  
352 the ASSESS study. *Respir Res*. 2014;15:122. doi:10.1186/s12931-014-0122-1
- 353 8. Ioanna T, Kocks J, Tzanakis N, Siafakas N, van der Molen T. Factors that influence  
354 disease-specific quality of life or health status in patients with COPD: a systematic review  
355 and meta-analysis of Pearson correlations. *Prim Care Respir J*. 2011;20(3):257-268.  
356 doi:10.4104/pcrj.2011.00029
- 357 9. Monteagudo M, Rodríguez-Blanco T, Llagostera M, et al. Factors associated with changes  
358 in quality of life of COPD patients: a prospective study in primary care. *Respir Med*.  
359 2013;107(10):1589-1597. doi:10.1016/j.rmed.2013.05.009
- 360 10. Price D, Small M, Milligan G, Higgins V, Gil EG, Estruch J. Impact of night-time  
361 symptoms in COPD: a real-world study in five European countries. *Int J Chron Obstruct*  
362 *Pulmon Dis*. 2013;8:595-603. doi:10.2147/COPD.S48570
- 363 11. Lopez-Campos JL, Calero C, Quintana-Gallego E. Symptom variability in COPD: a  
364 narrative review. *Int J Chron Obstruct Pulmon Dis*. 2013;8:231-238.  
365 doi:10.2147/COPD.S42866

- 366 12. Miravittles M, Menezes A, López Varela MV, et al. Prevalence and impact of respiratory  
367 symptoms in a population of patients with COPD in Latin America: The LASSYC  
368 observational study. *Respir Med*. 2018;134:62-69. doi:10.1016/j.rmed.2017.11.018
- 369 13. Zafari Z, Sin DD, Postma DS, et al. Individualized prediction of lung-function decline in  
370 chronic obstructive pulmonary disease. *CMAJ*. 2016;188(14):1004-1011.  
371 doi:10.1503/cmaj.151483
- 372 14. Hurst JR, Vestbo J, Anzueto A, et al. Susceptibility to Exacerbation in Chronic Obstructive  
373 Pulmonary Disease. *N Engl J Med*. 2010;363(12):1128-1138.  
374 doi:10.1056/NEJMoa0909883
- 375 15. Sadatsafavi M, Sin DD, Zafari Z, et al. The Association Between Rate and Severity of  
376 Exacerbations in Chronic Obstructive Pulmonary Disease: An Application of a Joint  
377 Frailty-Logistic Model. *Am J Epidemiol*. 2016;184(9):681-689. doi:10.1093/aje/kww085
- 378 16. Jameson JL, Longo DL. Precision Medicine — Personalized, Problematic, and Promising.  
379 *N Engl J Med*. 2015;372(23):2229-2234. doi:10.1056/NEJMs1503104
- 380 17. Partridge MR, Karlsson N, Small IR. Patient insight into the impact of chronic obstructive  
381 pulmonary disease in the morning: an internet survey. *Curr Med Res Opin*.  
382 2009;25(8):2043-2048. doi:10.1185/03007990903103006
- 383 18. Espinosa de los Monteros MJ, Peña C, Soto Hurtado EJ, Jareño J, Miravittles M.  
384 Variability of respiratory symptoms in severe COPD. *Arch Bronconeumol*. 2012;48(1):3-7.  
385 doi:10.1016/j.arbres.2011.07.004
- 386 19. Donaldson GC, Goldring JJ, Wedzicha JA. Influence of season on exacerbation  
387 characteristics in patients with COPD. *Chest*. 2012;141(1):94-100. doi:10.1378/chest.11-  
388 0281
- 389 20. Bourbeau J, Tan WC, Benedetti A, et al. Canadian Cohort Obstructive Lung Disease  
390 (CanCOLD): Fulfilling the need for longitudinal observational studies in COPD. *COPD*.  
391 2014;11(2):125-132. doi:10.3109/15412555.2012.665520
- 392 21. Hankinson JL, Odenrantz JR, Fedan KB. Spirometric reference values from a sample of  
393 the general U.S. population. *Am J Respir Crit Care Med*. 1999;159(1):179-187.  
394 doi:10.1164/ajrcm.159.1.9712108
- 395 22. Fletcher CM, Elmes PC, Fairbairn AS, Wood CH. The significance of respiratory  
396 symptoms and the diagnosis of chronic bronchitis in a working population. *Br Med J*.  
397 1959;2(5147):257-266.
- 398 23. Buist AS, McBurnie MA, Vollmer WM, et al. International variation in the prevalence of  
399 COPD (the BOLD Study): a population-based prevalence study. *Lancet*.  
400 2007;370(9589):741-750. doi:10.1016/S0140-6736(07)61377-4

- 401 24. Ten Have TR, Localio AR. Empirical Bayes estimation of random effects parameters in  
402 mixed effects logistic regression models. *Biometrics*. 1999;55(4):1022-1029.
- 403 25. Kessler R, Partridge MR, Miravittles M, et al. Symptom variability in patients with severe  
404 COPD: a pan-European cross-sectional study. *Eur Respir J*. 2011;37(2):264-272.  
405 doi:10.1183/09031936.00051110
- 406 26. Sumner H, Woodcock A, Kolsum U, et al. Predictors of objective cough frequency in  
407 chronic obstructive pulmonary disease. *Am J Respir Crit Care Med*. 2013;187(9):943-949.  
408 doi:10.1164/rccm.201211-2000OC
- 409 27. Huang W-C, Tsai Y-H, Wei Y-F, et al. Wheezing, a significant clinical phenotype of  
410 COPD: experience from the Taiwan Obstructive Lung Disease Study. *Int J Chron Obstruct*  
411 *Pulmon Dis*. 2015;10:2121-2126. doi:10.2147/COPD.S92062
- 412 28. Fletcher C, Peto R. The natural history of chronic airflow obstruction. *Br Med J*.  
413 1977;1(6077):1645-1648. doi:10.1136/bmj.1.6077.1645
- 414 29. Agustí A, Calverley PMA, Celli B, et al. Characterisation of COPD heterogeneity in the  
415 ECLIPSE cohort. *Respir Res*. 2010;11:122. doi:10.1186/1465-9921-11-122
- 416 30. Barsky AJ, Peekna HM, Borus JF. Somatic Symptom Reporting in Women and Men. *J Gen*  
417 *Intern Med*. 2001;16(4):266-275. doi:10.1046/j.1525-1497.2001.00229.x
- 418

419 **Table 1** Characteristics of study participants at study visits. Means (and standard deviations) are  
 420 reported unless otherwise indicated

|                                  | <b>Visit 1 (n=461)</b> | <b>Visit 2 (n=309)</b> | <b>Visit 3 (n=316)</b> |
|----------------------------------|------------------------|------------------------|------------------------|
| Age                              | 65.5 (10.3)            | 67.2 (10.3)            | 68.2 (9.5)             |
| Male (vs. female)                | 54.4%                  | 53.4%                  | 52.5%                  |
| BMI                              | 27.4 (5.7)             | 27.6 (6.0)             | 27.4 (5.9)             |
| Caucasian (vs. non-Caucasian)    | 97.4%                  | 97.4%                  | 98.1%                  |
| Comorbidities                    |                        |                        |                        |
| 0 comorbidities                  | 59.2%                  | 86.1%                  | 86.1%                  |
| 1 comorbidity                    | 32.5%                  | 11.7%                  | 13.0%                  |
| ≥2 comorbidities                 | 8.2%                   | 2.3%                   | 0.9%                   |
| Smoking between visits (vs. no)  | 71.8%                  | 27.2%                  | 25.0%                  |
| Lifetime pack-years smoked       | 25.5 (25.9)            | 25.2 (25.4)            | 25.7 (25.5)            |
| FEV <sub>1</sub> (L)             | 2.2 (0.8)              | 2.1 (0.8)              | 2.1 (0.7)              |
| % Predicted FEV <sub>1</sub>     | 76.3 (18.3)            | 76.0 (19.1)            | 76.4 (18.9)            |
| Diagnosed COPD (vs. undiagnosed) | 22.1%                  | 26.5%                  | 30.4%                  |
| Symptoms (present vs. absent)    |                        |                        |                        |
| Cough                            | 43.6%                  | 44.7%                  | 38.6%                  |
| Phlegm                           | 31.2%                  | 30.7%                  | 26.9%                  |
| Wheeze                           | 46.0%                  | 42.1%                  | 40.5%                  |
| Dyspnea*                         | 50.0%                  | 44.9%                  | 42.6%                  |
| Any symptoms*                    | 78.9%                  | 74.5%                  | 70.9%                  |

421

422 \* Determined for the subset of participants in which dyspnea was measured (N=502).

423 BMI: Body Mass Index, FEV<sub>1</sub>: Forced Expiratory Volume in 1 second

424 **Table 2** Percentage of between-individual variation in symptoms explained by individual's lung  
425 function and all measured characteristics combined

|                               | <b>Cough</b> | <b>Phlegm</b> | <b>Wheeze</b> | <b>Dyspnea</b> | <b>Any Symptoms</b> |
|-------------------------------|--------------|---------------|---------------|----------------|---------------------|
| FEV <sub>1</sub>              | 3%           | 82%           | 0%            | 26%            | 19%                 |
| All measured characteristics* | 21%          | 86%           | <1%           | 44%            | 92%                 |

426

427 \* Visit, Age, Sex, Caucasian, BMI, Comorbidities, Smoking status, Pack-years of smoking,  
428 Diagnosis status, FEV<sub>1</sub>

429 BMI: Body Mass Index, FEV<sub>1</sub>: Forced Expiratory Volume in 1 second

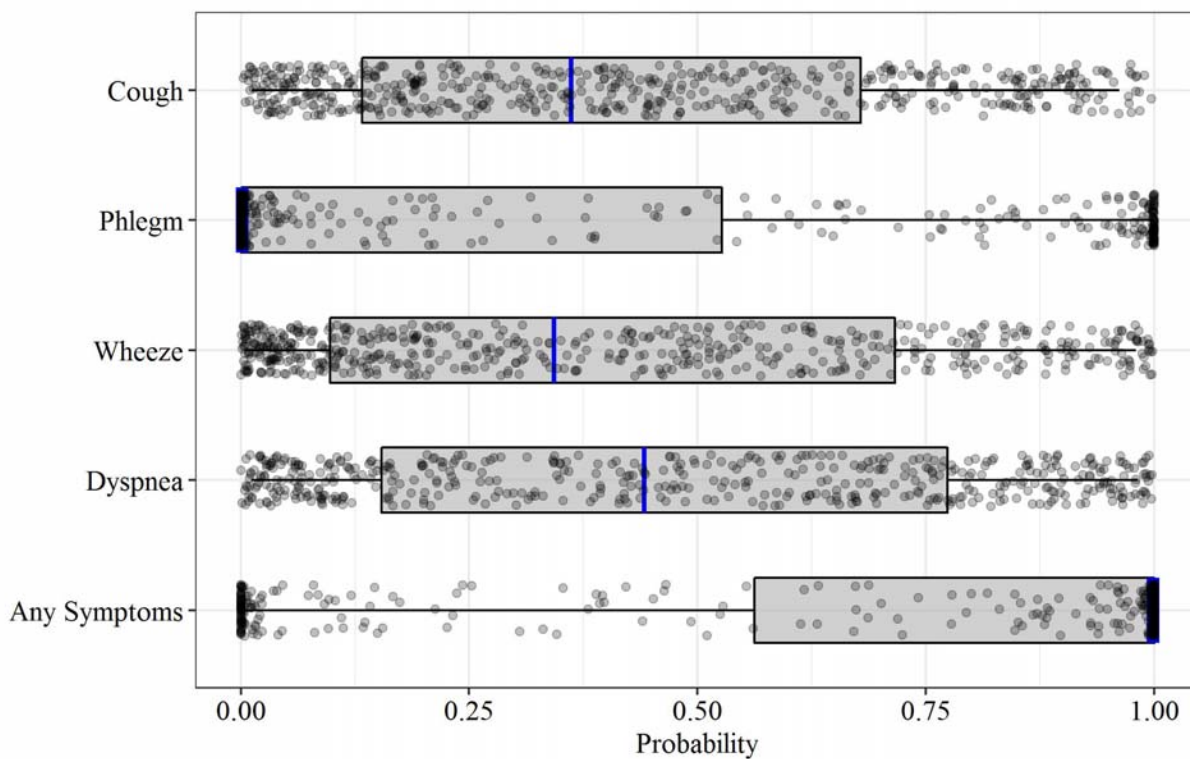

**Figure 1** The distribution of individual-specific probabilities\* of the occurrence of symptoms.

The box spans the lower and upper quartiles (25%-75%) of individuals around the median (blue line).

\*Individual random effects are drawn from a normal distribution with a mean of 0 and standard deviation of the fitted random effects. The statistics shown by the boxes were determined from 1000 repetitions for each individual, and the points show the results of one repetition.

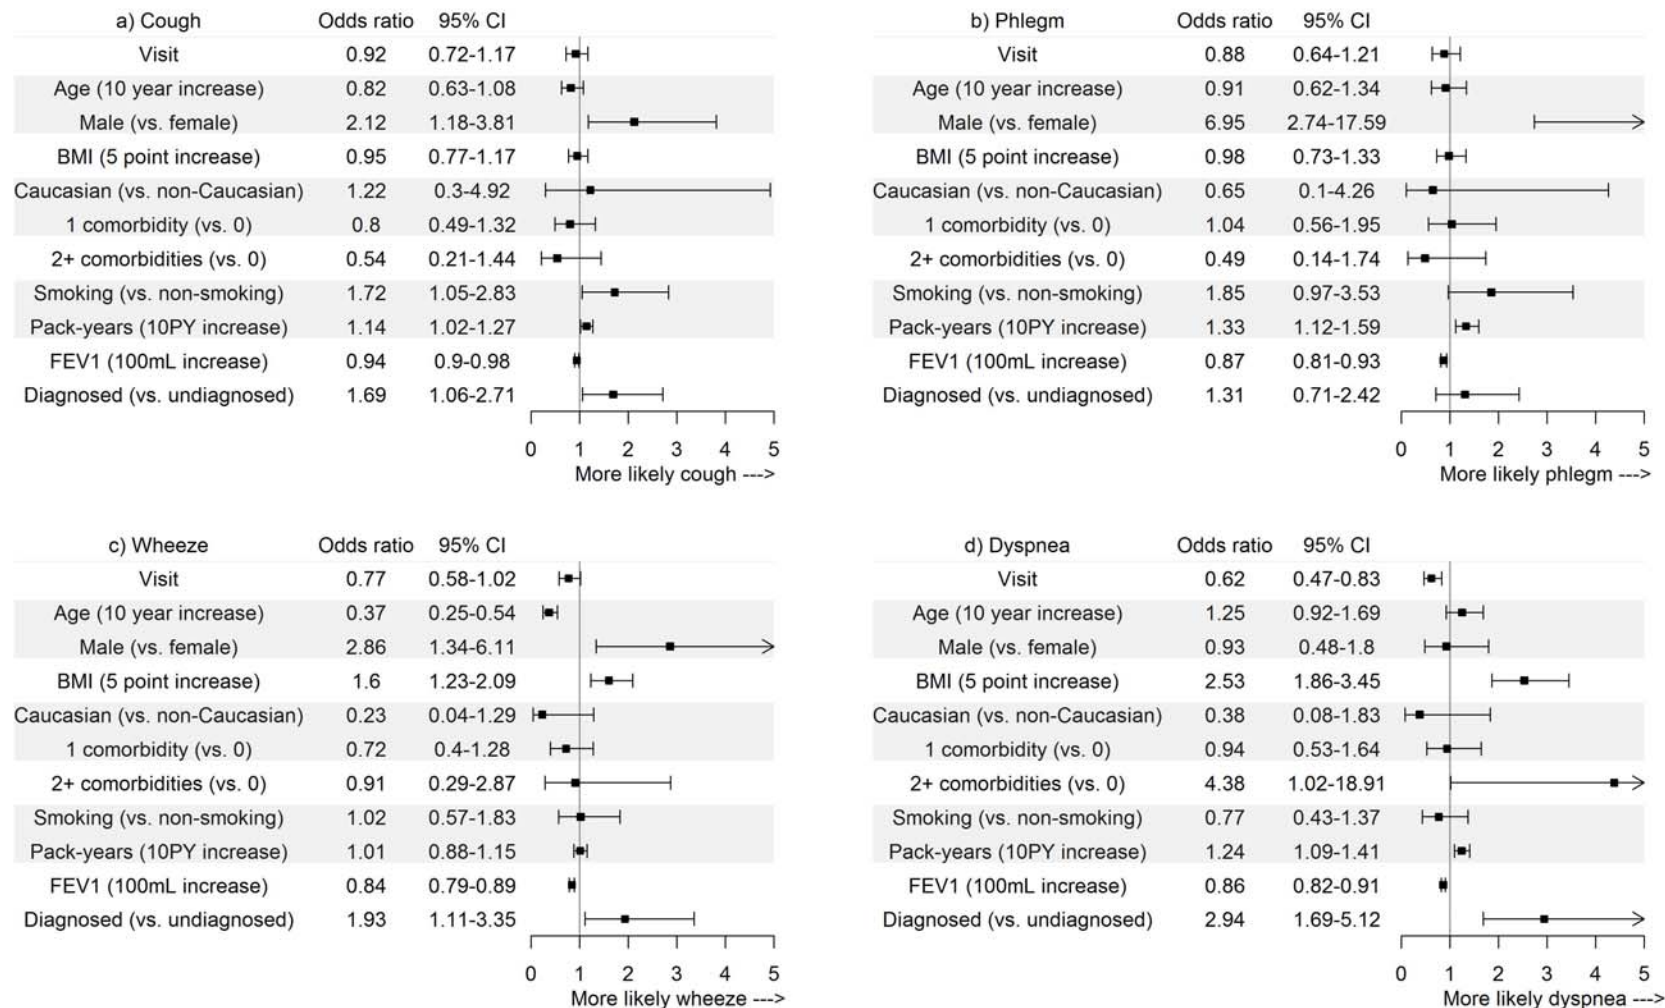

**Figure 2** Odds ratios for the associations between independent variables and the presence of a) cough, b) phlegm, c) wheeze, and d) dyspnea.



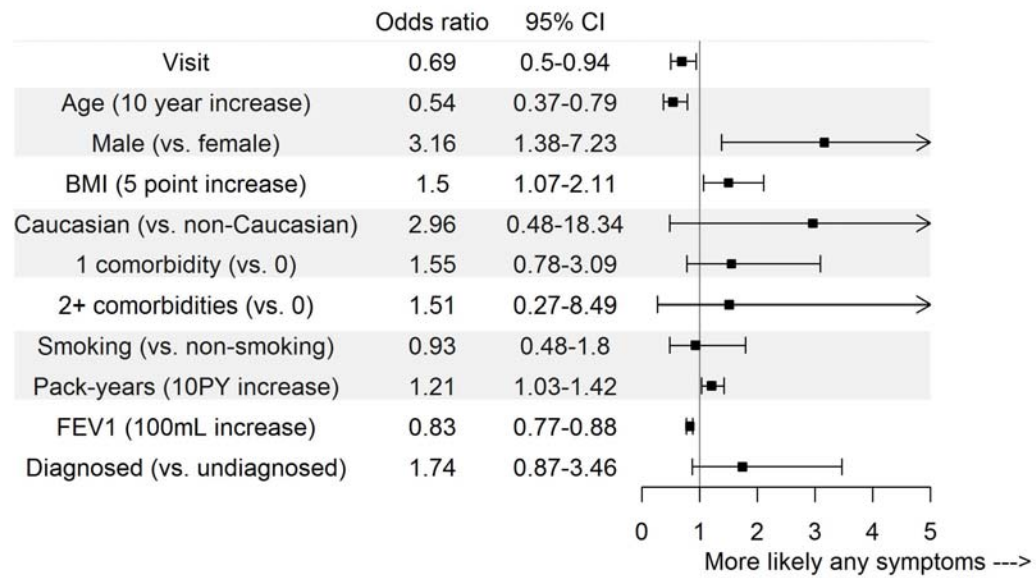

**Figure 3** Odds ratios for the associations between independent variables and the presence of any symptoms.
